# Supplementary material
Source: PubMed Central journal article supplement (PMC1570801)
Supplement: bmj_333_7569_612__1.pdf [file bmj_333_7569_612__1.pdf]

### Extra references for bmj.com only

- w1. Kallander K, Tomson G, Nsabagasani X, Sabiiti JN, Pariyo G, Peterson S. Integrated management of childhood illness: a WHO/UNICEF initiative. *Bull World Health Organ* 1997;75(suppl 1).
- w2. Kallander K, Tomson G, Nsabagasani X, Sabiiti JN, Pariyo G, Peterson S. Can community health workers and caretakers recognise pneumonia in children? Experiences from western Uganda. *Trans R Soc Trop Med Hyg* 2006;100:956-63.
- w3. Winch PJ, Gilroy KE, Wolfheim C, Starbuck ES, Young MW, Walker LD, et al. Intervention models for the management of children with signs of pneumonia or malaria by community health workers. *Health Policy Plan* 2005;20:199-212.
- w4. Hadi A. Management of acute respiratory infections by community health volunteers: experience of Bangladesh Rural Advancement Committee (BRAC). *Bull World Health Organ* 2003;81:183-9.
- w5. Lozano JM, Steinhoff M, Ruiz JG, Mesa ML, Martinez N, et al. Clinical predictors of acute radiological pneumonia and hypoxaemia at high altitude. *Arch Dis Child* 1994;71:323-7.
- w6. Lanata CF, Rudan I, Boschi-Pinto C, Tomaskovic L, Cherian T, Weber M, et al. Methodological and quality issues in epidemiological studies of acute lower respiratory infections in children in developing countries. *Int J Epidemiol* 2004;33:1362-72.
- w7. Vuori-Holopainen E, Salo E, Saxen H, Hedman K, Hyypia T, Lahdenpera R, et al. Etiological diagnosis of childhood pneumonia by use of transthoracic needle aspiration and modern microbiological methods. *Clin Infect Dis* 2002;34:583-90.
